# Supplementary material
Source: MDPI journal article supplement (https://www.mdpi.com/2218-0532/91/4/45)
Supplement: s1 [file s1]

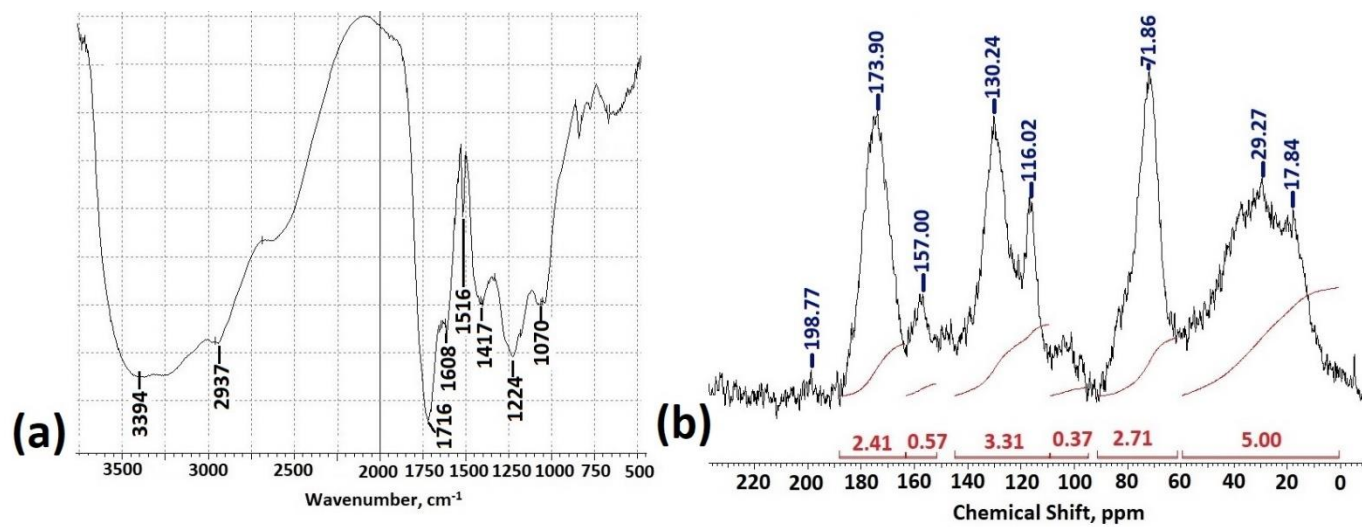

Figure S1. FTIR spectrum (a) and Solid-state  $^{13}\text{C}$  NMR spectrum (b) of FA

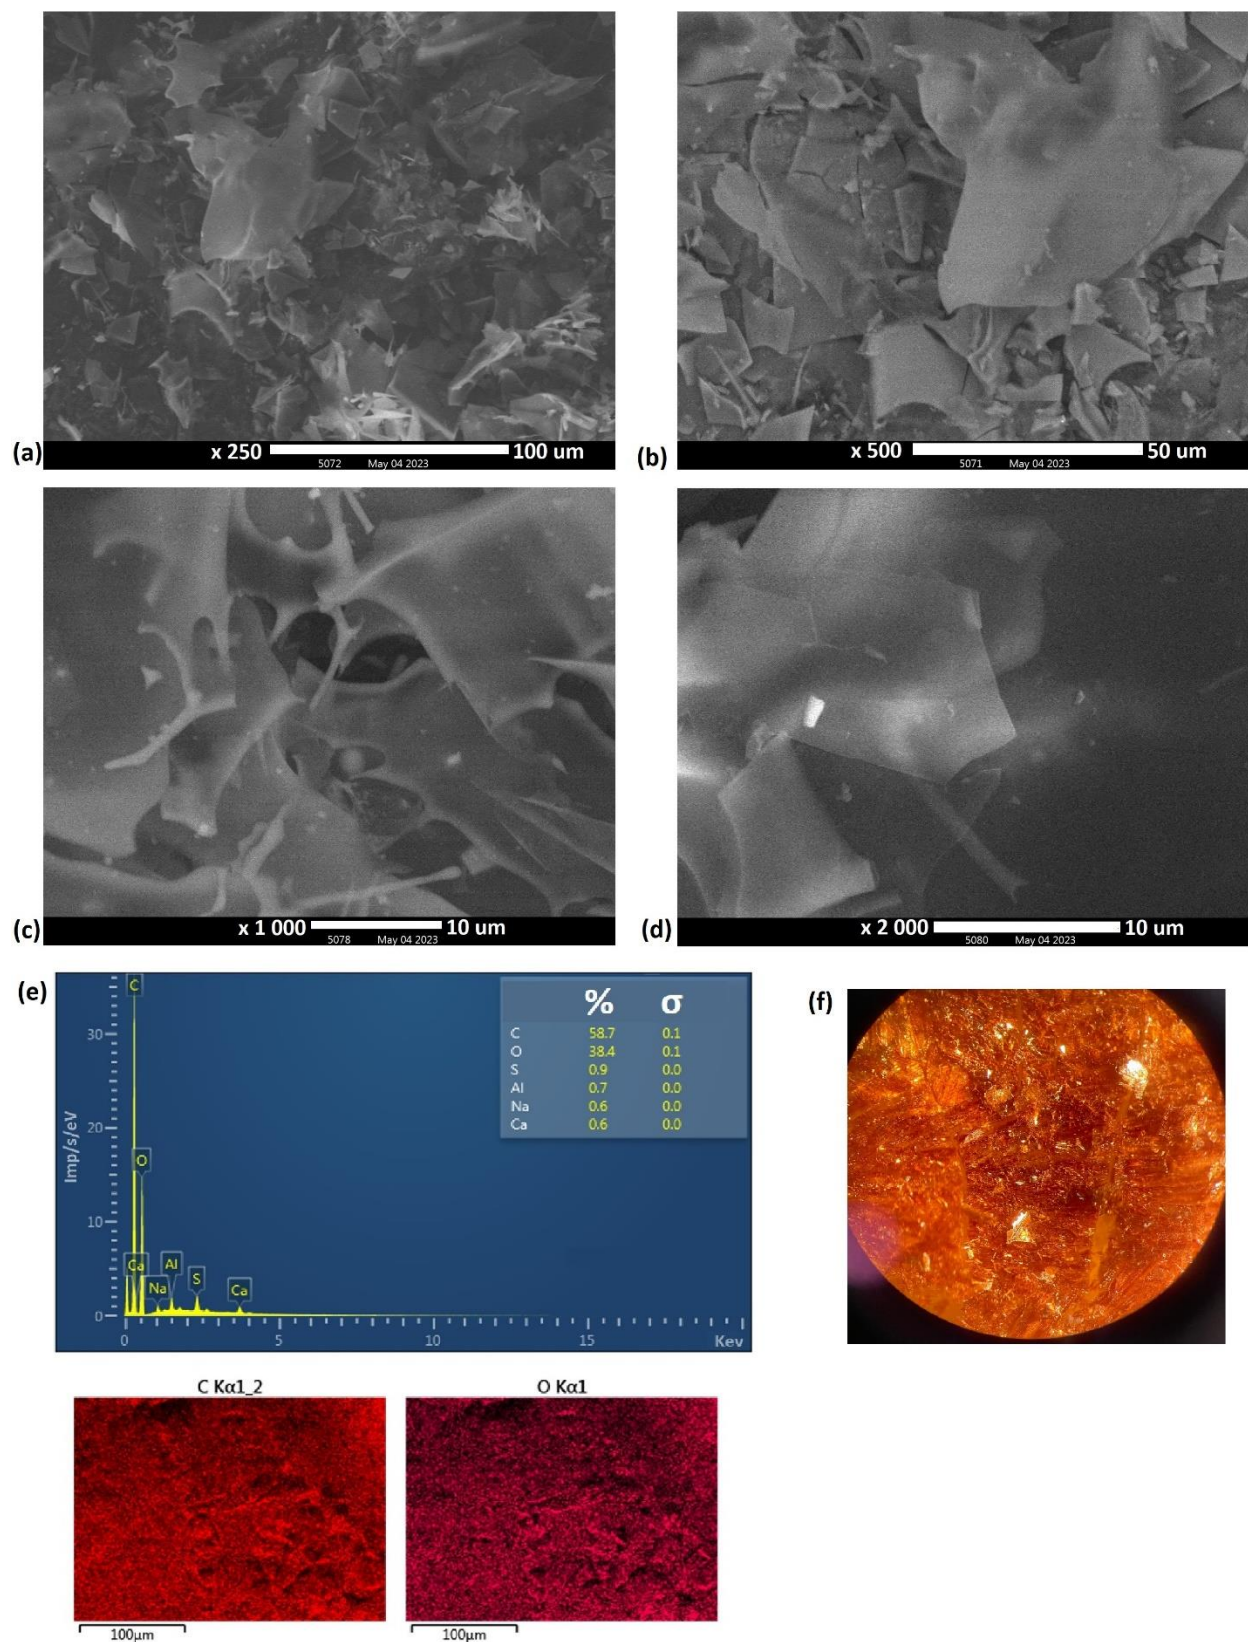

**Figure S2.** SEM images (a–d), EDX spectra and the distribution of elements in powders on aluminum foil (e) and FA appearance (f) respectively.

**Table S1. Standard deviations of the results of measurements of the fluorescence of the FA solution**

| FA concentration,<br>μg/mL | Fluorescence<br>intensity, a.u. | RSD, % |
|----------------------------|---------------------------------|--------|
| 1.00                       | 0.081±0.001                     | 1.512  |
| 2.00                       | 0.115±0.002                     | 1.695  |
| 3.00                       | 0.209±0.003                     | 1.442  |
| 4.00                       | 0.265±0.002                     | 0.924  |
| 5.00                       | 0.324±0.005                     | 1.667  |
| 6.00                       | 0.407±0.002                     | 0.444  |
| 7.00                       | 0.501±0.002                     | 0.489  |
| 8.00                       | 0.513±0.002                     | 0.477  |
| 9.00                       | 0.611±0.002                     | 0.318  |
| 10.00                      | 0.672±0.002                     | 0.269  |
